# Supplementary material for: Electronic coupling between base pair dimers of LNA:DNA oligomers
Source: Royal Society of Chemistry journal article supplement (doi:10.1039/b712506b), 2008-01-01
Supplement: b712506b.pdf [file b712506b.pdf]

## Electronic Supplementary Information (ESI)

### Electronic Coupling Between Base Pair Dimers of LNA:DNA Oligomers

Anela Ivanova<sup>#</sup>, Grzegorz Jezierski, and Notker Rösch\*

*Department Chemie, Theoretische Chemie, Technische Universität München,  
85747 Garching, Germany*

---

<sup>#</sup> On leave from University of Sofia, Faculty of Chemistry, Department of Physical Chemistry, 1 J. Bourchier Ave., 1164 Sofia, Bulgaria

\* Corresponding author: E-mail: roesch@ch.tum.de

## Formalism used in the manuscript

For convenience of the reader, we summarize below the essentials of the FCD method.<sup>1</sup>

Within the framework of the FCD method,<sup>1</sup> the following formula is used for calculation of the coupling matrix elements between the donor and the acceptor state:

$$H_{DA} = \frac{(E_2 - E_1)|\Delta q_{12}|}{\sqrt{(\Delta q_1 - \Delta q_2)^2 + 4\Delta q_{12}^2}}, \quad (S1)$$

where  $\Delta q_1$  and  $\Delta q_2$  are the donor-acceptor charge differences in the corresponding adiabatic states within a two-state model,  $\Delta q_{12}$  is the off-diagonal term, and  $E_2 - E_1$  is the adiabatic splitting between donor and acceptor states.  $E_2 - E_1$  is estimated within Koopmans' approximation as the difference between the two highest occupied molecular orbitals (HOMO and HOMO-1) in the closed-shell neutral base-pair dimer. The dimer wavefunctions are calculated with RHF/6-31G\*. Fragment charge differences ( $\Delta q_{mn}$ ) are based on Mulliken-type fragment charges ( $q_{mn}$ ):

$$q_{mn}(F) = \frac{1}{2} \left[ \sum_{i \in F} C_{i,HOMO+1-m} \sum_{j=1}^M C_{j,HOMO+1-n} S_{ij} + \sum_{i \in F} C_{i,HOMO+1-n} \sum_{j=1}^M C_{j,HOMO+1-m} S_{ij} \right] \quad (S2)$$

$$\Delta q_{mn} = q_{mn}(D) - q_{mn}(A) \quad (S3)$$

F – D or A; m,n – 1,2; M – index for basis-set atomic orbitals;  $C_i$  and  $C_j$  – coefficients of the corresponding molecular orbitals, and  $S_{ij}$  – overlap integrals.

---

1 A. A. Voityuk and N. Rösch, *J. Chem. Phys.*, 2002, **117**, 5607-5616.

**Table S1:** Average values  $\langle H_{DA}^2 \rangle$  (with standard deviations) of the FCD coupling elements, calculated for dimer **5-6** in **DNA-DNA** and **5\_1LNA-DNA** from batches of different size, i.e. consisting of snapshots extracted at different time intervals. Time steps in ps, energies in eV<sup>2</sup>.

| Duplex            | Time step | Structures in batch | $\langle H_{DA}^2 \rangle$ |
|-------------------|-----------|---------------------|----------------------------|
| <b>5_1LNA-DNA</b> | 20        | 500                 | 0.0095±0.0115              |
|                   | 14        | 714                 | 0.0093±0.0109              |
|                   | 10        | 1000                | 0.0094±0.0113              |
|                   | 8         | 1250                | 0.0093±0.0111              |
|                   | 6         | 1666                | 0.0089±0.0105              |
|                   | 4         | 2500                | 0.0093±0.0110              |
|                   | 2         | 5000                | 0.0092±0.0109              |
| <b>DNA-DNA</b>    | 20        | 500                 | 0.0084±0.0111              |
|                   | 14        | 714                 | 0.0087±0.0114              |
|                   | 10        | 1000                | 0.0084±0.0114              |
|                   | 8         | 1250                | 0.0081±0.0110              |
|                   | 6         | 1666                | 0.0084±0.0113              |
|                   | 4         | 2500                | 0.0083±0.0111              |
|                   | 2         | 5000                | 0.0083±0.0113              |

**Table S2:** p-values yielded by the double-sided t-tests on the difference between the calculated average  $H_{DA}^2$  values for pairs of identical dimers in different duplexes.

| Duplex 1    | Duplex 2       | Dimer      | p-value              | Duplex 1     | Duplex 2     | Dimer      | p-value              |
|-------------|----------------|------------|----------------------|--------------|--------------|------------|----------------------|
| <b>DNA-</b> | <b>2_1LNA-</b> | <b>1-2</b> | $6.6 \times 10^{-2}$ | <b>DNA-</b>  | <b>3LNA-</b> | <b>1-2</b> | $2.2 \times 10^{-2}$ |
| <b>DNA</b>  | <b>DNA</b>     | <b>2-3</b> | $4.0 \times 10^{-5}$ | <b>DNA</b>   | <b>DNA</b>   | <b>2-3</b> | $<1 \times 10^{-5}$  |
|             |                | <b>3-4</b> | $<1 \times 10^{-5}$  |              |              | <b>3-4</b> | $<1 \times 10^{-5}$  |
|             |                | <b>4-5</b> | $4.1 \times 10^{-3}$ |              |              | <b>4-5</b> | $<1 \times 10^{-5}$  |
|             |                | <b>5-6</b> | $4.1 \times 10^{-2}$ |              |              | <b>5-6</b> | $1.0 \times 10^{-5}$ |
|             |                | <b>6-7</b> | $4.2 \times 10^{-1}$ |              |              | <b>6-7</b> | $<1 \times 10^{-5}$  |
|             |                | <b>7-8</b> | $3.6 \times 10^{-2}$ |              |              | <b>7-8</b> | $4.1 \times 10^{-2}$ |
|             |                | <b>8-9</b> | $1.2 \times 10^{-3}$ |              |              | <b>8-9</b> | $<1 \times 10^{-5}$  |
| <b>DNA-</b> | <b>5_1LNA-</b> | <b>1-2</b> | $4.9 \times 10^{-1}$ | <b>DNA-</b>  | <b>9LNA-</b> | <b>1-2</b> | $<1 \times 10^{-5}$  |
| <b>DNA</b>  | <b>DNA</b>     | <b>2-3</b> | $1.8 \times 10^{-2}$ | <b>DNA</b>   | <b>DNA</b>   | <b>2-3</b> | $<1 \times 10^{-5}$  |
|             |                | <b>3-4</b> | $<1 \times 10^{-5}$  |              |              | <b>3-4</b> | $<1 \times 10^{-5}$  |
|             |                | <b>4-5</b> | $2.1 \times 10^{-3}$ |              |              | <b>4-5</b> | $<1 \times 10^{-5}$  |
|             |                | <b>5-6</b> | $1.1 \times 10^{-1}$ |              |              | <b>5-6</b> | $<1 \times 10^{-5}$  |
|             |                | <b>6-7</b> | $6.5 \times 10^{-2}$ |              |              | <b>6-7</b> | $<1 \times 10^{-5}$  |
|             |                | <b>7-8</b> | $9.5 \times 10^{-1}$ |              |              | <b>7-8</b> | $<1 \times 10^{-5}$  |
|             |                | <b>8-9</b> | $5.0 \times 10^{-4}$ |              |              | <b>8-9</b> | $<1 \times 10^{-5}$  |
| <b>DNA-</b> | <b>7_1LNA-</b> | <b>1-2</b> | $6.4 \times 10^{-1}$ | <b>3LNA-</b> | <b>9LNA-</b> | <b>1-2</b> | $<1 \times 10^{-5}$  |
| <b>DNA</b>  | <b>DNA</b>     | <b>2-3</b> | $5.7 \times 10^{-2}$ | <b>DNA</b>   | <b>DNA</b>   | <b>2-3</b> | $<1 \times 10^{-5}$  |
|             |                | <b>3-4</b> | $3.3 \times 10^{-2}$ |              |              | <b>3-4</b> | $<1 \times 10^{-5}$  |
|             |                | <b>4-5</b> | $1.1 \times 10^{-1}$ |              |              | <b>4-5</b> | $<1 \times 10^{-5}$  |
|             |                | <b>5-6</b> | $1.2 \times 10^{-2}$ |              |              | <b>5-6</b> | $<1 \times 10^{-5}$  |
|             |                | <b>6-7</b> | $6.0 \times 10^{-1}$ |              |              | <b>6-7</b> | $<1 \times 10^{-5}$  |
|             |                | <b>7-8</b> | $<1 \times 10^{-5}$  |              |              | <b>7-8</b> | $<1 \times 10^{-5}$  |
|             |                | <b>8-9</b> | $<1 \times 10^{-5}$  |              |              | <b>8-9</b> | $<1 \times 10^{-5}$  |

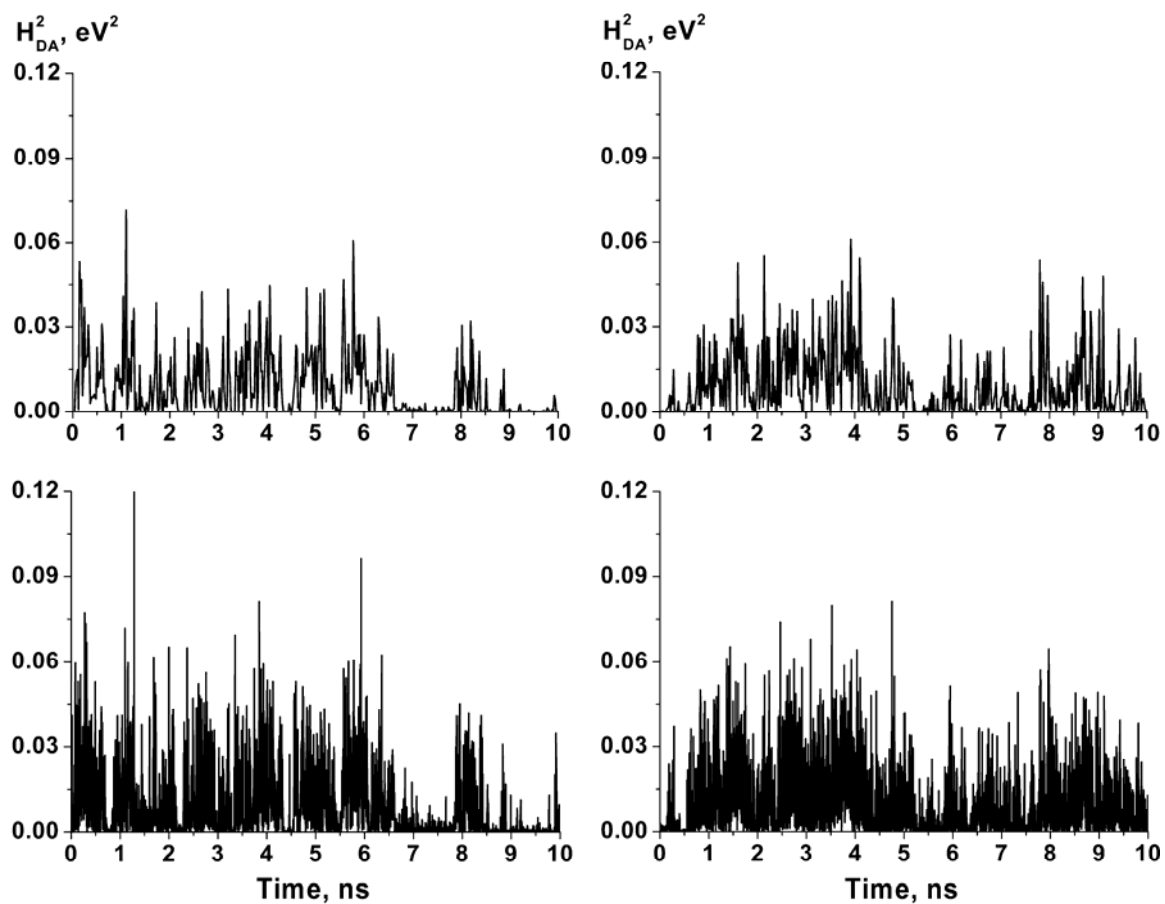

**Figure S1:** Trajectory evolution of  $H_{DA}^2$  calculated for dimer **5-6** in **DNA-DNA** (left panels) and **5\_1LNA-DNA** (right panels) within snapshot sets of 500 (top panels) and 5000 (bottom panels) structures.

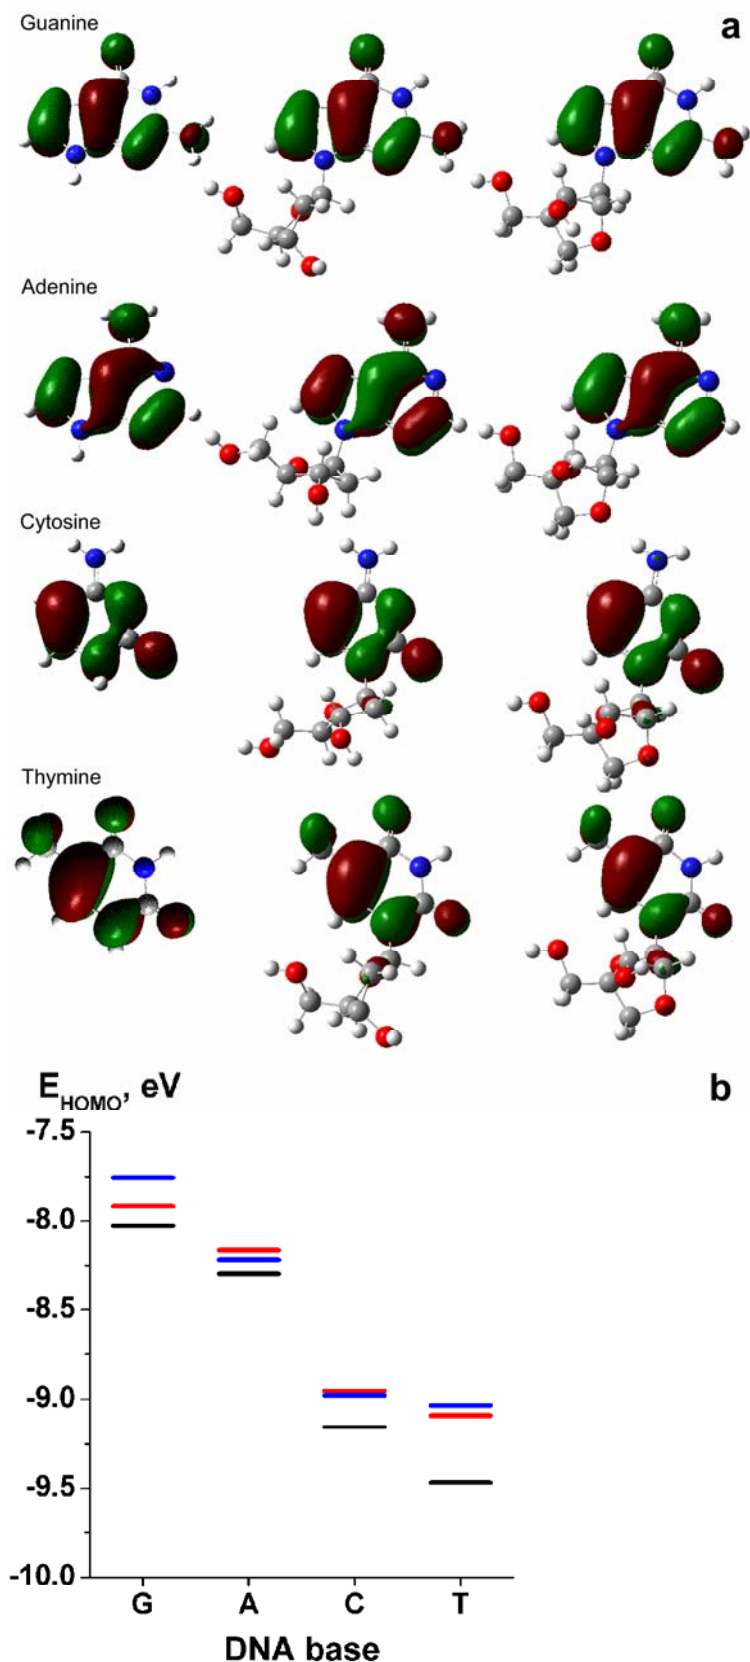

**Figure S2:** (a) Highest occupied molecular orbitals (HOMOs) of DNA bases without sugar (left panels), with DNA sugar (middle panels) and with LNA sugar (right panels); (b) energy diagram of HOMOs of DNA bases without sugar (black), with DNA sugar (blue) and with LNA sugar (red).

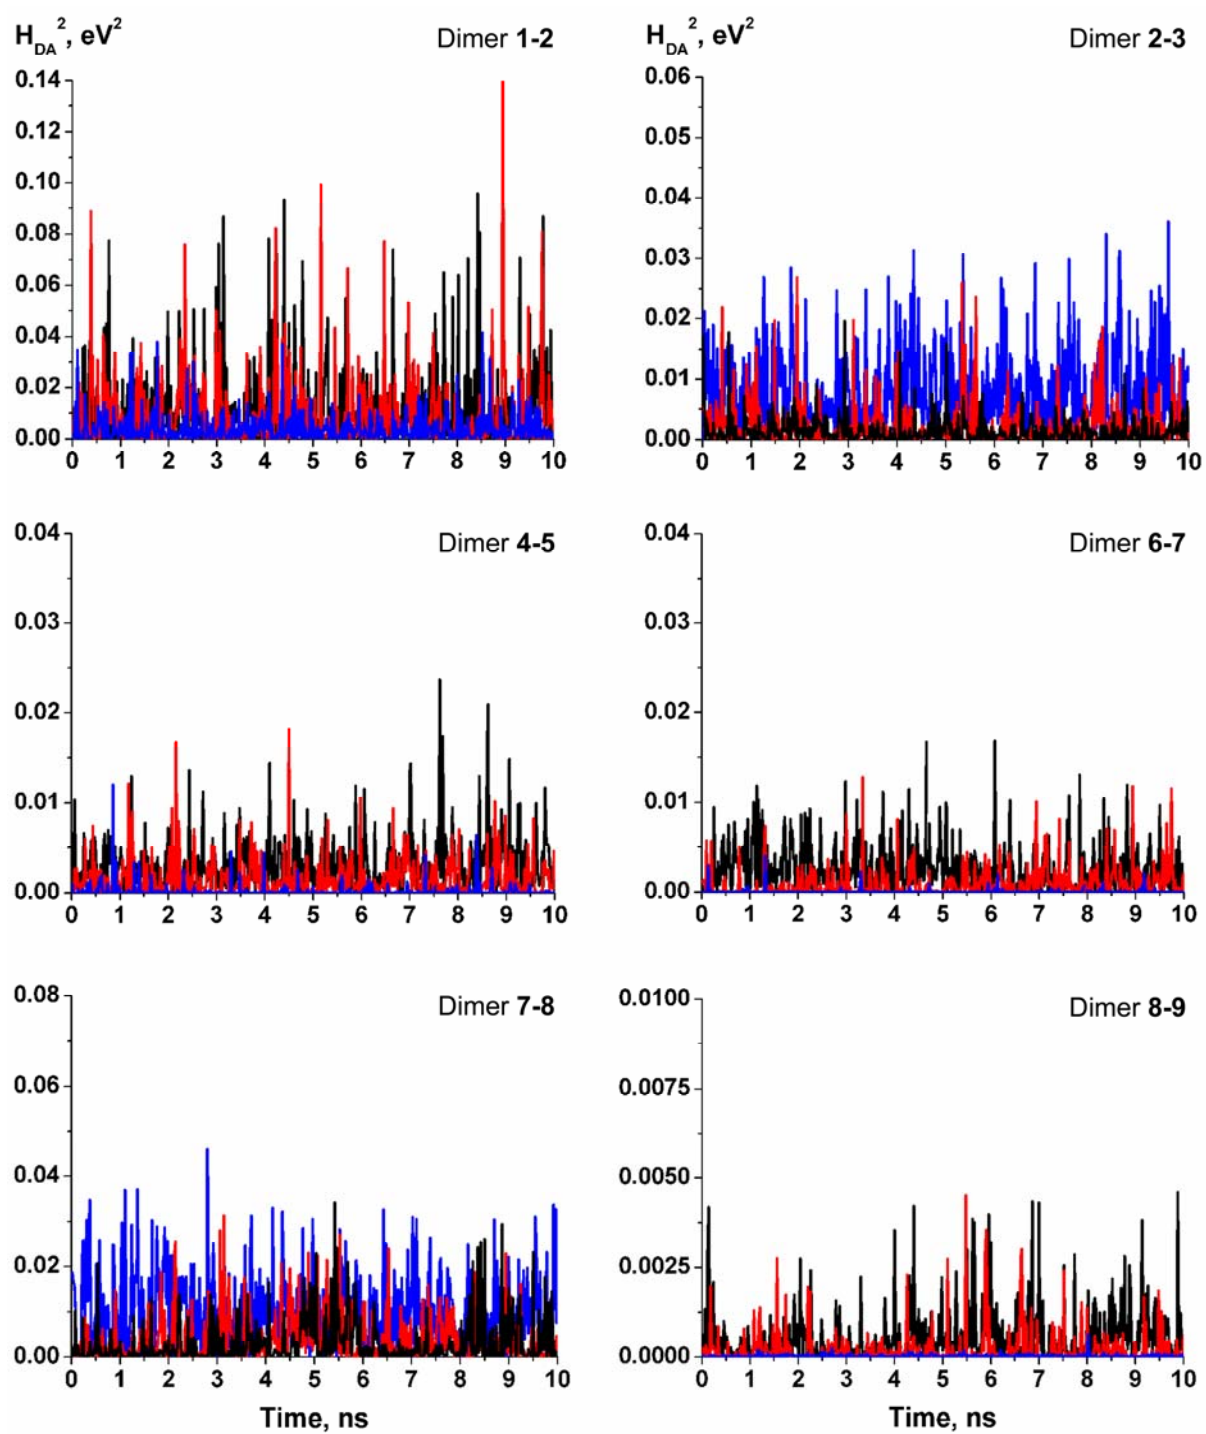

**Figure S3:** Squared values of the electronic coupling elements calculated for each snapshot of dimers 1-2 and 2-3 (top panels), 4-5 and 6-7 (middle panels), and 7-8 and 8-9 (bottom panels) from DNA-DNA (blue), 3LNA-DNA (red) and 9LNA-DNA (black).

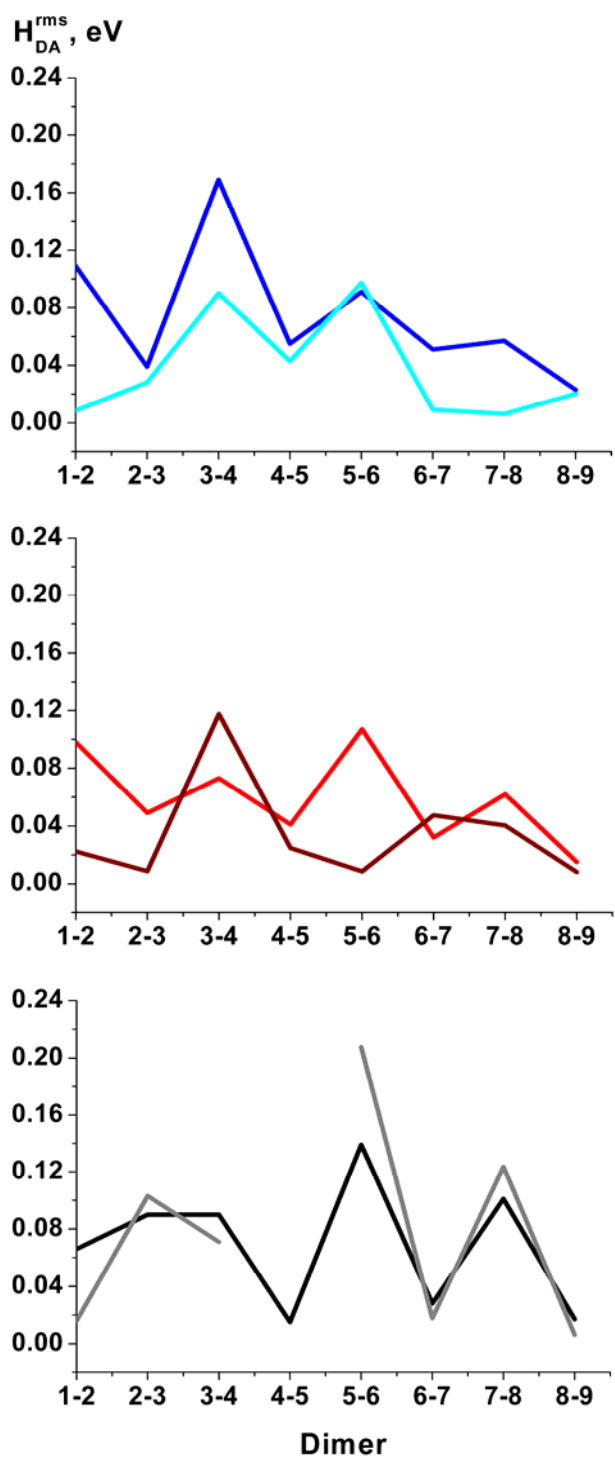

**Figure S4:** Comparison of rms values of coupling elements  $H_{DA}$  between dimers, from MD trajectory snapshots, with coupling elements of the corresponding average structures. Color code: **DNA-DNA** (MD) – blue, **DNA-DNA** (average) – cyan, **3LNA-DNA** (MD) – red, **3LNA-DNA** (average) – brown, **9LNA-DNA** (MD) – black, **9LNA-DNA** (average) – grey.
